# Supplementary material
Source: Research Square preprint supplement (doi:10.21203/rs.3.rs-9471902/v1)
Supplement: Supplementary file 1 [file 556daf3ba8cfd81e04be7fc2.docx]

**Appendix A:** Summarized Results of 31 Included Papers

| **Author** | **Design Category** | **Context Category** | **AI Category** | **Primary Outcome Category** | **Sample Size Characteristics** | **Scope Classification** | **SRL Phase(s)** | |
| --- | --- | --- | --- | --- | --- | --- | --- | --- |
| Abdulla et al. (2024) | Quasi-Experimental | Higher Ed (Programming) | GenAI Chatbot | Academic Performance | N=26 (Undergraduate students) | Core | | Performance |
| Bang et al. (2023) | Cluster RCT | K-12 (Early Childhood) | Adaptive Learning System | Academic Performance | N=886 | Core | | Performance |
| Chan et al. (2024) | Randomized Controlled Trial | Higher Ed | LLM (GPT-3.5) Feedback | Essay Writing & Affect | N=918 | Core | | Performance; Self-Reflection |
| Chun et al. (2025) | Randomized two-group pre–post control (mixed methods) | University health sciences (assistive technology course in OT) over 15-week semester | Generative-AI “AI textbook” (LLama 3.1 + RAG; local/on-device-like deployment) | Academic achievement + learning experience | Included N=86 (from initial 132 after exclusions); randomized into AI-learning vs traditional groups | Core | | Performance |
| Coban et al. (2025) | Crossover design (feedback vs no-feedback across question sets) | University physics lab course: AR quantum cryptography experiment + eye tracking | LLM feedback (GPT-4 via OpenAI API) embedded in AR | Cognitive learning outcomes + gaze-based process measures | 21 student groups (Group A=11, Group B=10); mean age ~20.95 | Core | | Performance |
| Vicente-Yagüe-Jara et al. (2023) | Quasi-Experimental | Higher Ed (Creative Writing) | GenAI (LLMs) | Creativity (Fluency/Flexibility) | N=193 (University students) + 20 AI systems | Adjacent | | Performance; Self-Reflection |
| Dillon (2024) | Exploratory Survey | Higher Ed | LLM (ChatGPT) Training | Prompt Literacy & SRL | N=37 | Core | | Forethought; Performance |
| El-Garawany (2024) | Quasi-experimental | Higher Ed (EFL) | AI Writing Assistant | Writing Performance & Affect | Small (N=18) | Adjacent | | Performance |
| ElSabagh (2021) | Quasi-experimental pretest–posttest control | University “learning skills” course (first-year deanship; ages ~17–18) | Adaptive e-learning based on VARK learning styles | Student engagement (skills, participation/interaction, performance, emotional) | N=118; control 58 (31M/27F) vs experimental 60 (36M/24F) | Adjacent | | Performance |
| Hajian et al. (2021) | Experimental | Higher Ed | Just-in-Time Prompts | Knowledge Gain | N=13 | Core | | Performance |
| Horvers et al. (2024) | Quasi-Experimental | K-12 (Primary) | Adaptive Learning System | Regulation & Learning | N=114 | Core | | Forethought; Performance |
| Li et al. (2025) | Field Experiment (3 conditions) | Higher Ed (Graduate Academic Writing) | Rule-based Analytics / Adaptive Fading | Learning Performance (Essay Score) | N=154 (42 Adaptive, 45 Fixed, 67 Control) | Core | | Forethought; Performance |
| Lim et al. (2023) | Experimental (Pre-Post, 3 conditions) | Higher Ed (University, Lab setting) | Rule-based Analytics / Adaptive Fading | SRL Activities & Learning Performance | N=94 (35 Personalized, 30 Generalized, 29 Control) | Core | | Forethought; Performance |
| Lim et al. (2024) | Pre-Post Experiment | Higher Ed | Real-time Personalized Scaffolds | SRL Processes & Outcomes | N=59 | Core | | Forethought; Performance |
| Menekse et al. (2025) | Quasi-Experimental | Higher Ed | NLP Feedback | Reflection Quality | N=1,268 | Core | | Performance; Self-Reflection |
| Nye et al. (2018) | Quasi-experimental | Higher Ed (Math) | Hybrid ITS | Algebra Proficiency | Medium (N=76) | Core | | Performance |
| Okubo et al. (2023) | Controlled experiment (two-group comparison; dashboard vs no-dashboard review) | University e-learning ecosystem (Moodle + BookRoll); review of slide-based materials + quizzes | Learning-analytics recommender / review dashboard | Learning performance (post-review test gains) + perceived usefulness | N=28 university students; two groups of 14 (dashboard vs no dashboard) | Core | | Performance; Self-Reflection |
| Panjaburee et al. (2024) | Quasi-Experimental | Secondary Ed (8th Grade) | Fuzzy Logic / Decision Tree | Digital Citizenship Knowledge & Affection | N=110 (57 Experimental, 53 Control) | Adjacent | | Performance |
| Panwale & Vijayakumar (2025) | Quasi-Experimental | Higher Ed (MBA) | Adaptive Learning System | Skill Acquisition | N=64 | Core | | Performance |
| Pape & Thomas (2025) | Between-subject pre–post experiment (stratified randomization; prompting vs no prompting) | Lower secondary (6th grade) CBLE “Brainix” for English learning; home + school use over 3 weeks | Adaptive metacognitive prompting / SRL scaffolding | Metacognitive SRL (self-report + trace) + learning performance (recall/transfer) | Final analyzed N=72 (from 106 due to illness/technical issues): prompting 38 vs control 34 | Core | | Forethought; Performance |
| Pellas (2025) | Within-Subjects | Teacher Ed (Science) | AI-Generated Video | Self-Efficacy & Transfer | N=55 (Pre-service teachers) | Adjacent | | Performance; Self-Reflection |
| Pesovski et al. (2024) | Exploratory Case Study | Higher Ed | GenAI (Personas) | Engagement & Performance | N=20 | Core | | Performance; Self-Reflection |
| Rahimi et al. (2021) | One-Group Pre-Post | K-12 (Physics Game) | Automated Incentive System | Behavioral Regulation & Learning | N=199 (High school students) | Adjacent | | Performance |
| Reinhold et al. (2020) | RCT (Cluster) | K-12 (Grade 6) | Adaptive eBook | Math Knowledge | Large (N=1,005) | Core | | Performance |
| Santhosh et al. (2024) | Between-Subjects | Higher Ed | Gaze-Driven LLM | Comprehension | N=22 | Core | | Performance |
| Serrano-Mendizabal et al. (2023) | Experimental (Pre-Post) | Primary Ed (6th Grade) | Intelligent Tutoring System (ITS) | Reading Comprehension (Deep vs. Surface) | N=130 (71 ITS group, 59 Control) | Core | | Performance |
| ter Beek et al. (2019) | Quasi-experimental | K-12 (History) | Digital Scaffolding | Reading Comprehension | Medium (N=174) | Core | | Performance |
| Wang et al. (2023) | Experimental | K-12 (Mathematics) | Learning Analytics Dashboard | Learning Strategies & Performance | N=145 (Elementary students) | Core | | Performance; Self-Reflection |
| Winkler et al. (2021) | Quasi-Experimental | K-12 & Vocational (Law) | Smart Personal Assistant | Problem-Solving Skills | N=90 (45 High school, 45 Vocational) | Core | | Performance |
| Wu et al. (2017) | Experimental (Pre-Post) | Higher Ed (Undergraduate) | Dynamic Scaffolding / Adaptive System | Learning Effectiveness & Satisfaction | N=60 (30 Experimental, 30 Control) | Core | | Performance |
| Yan et al. (2025) | RCT (Lab) | Higher Ed (Health) | Generative AI Agents | Visual Analytics Comprehension | Medium (N=117) | Core | | Performance |
